# Supplementary material for: Detection of Schistosoma mansoni and Schistosoma haematobium by Real-Time PCR with High Resolution Melting Analysis
Source: PubMed Central journal article supplement (PMC4519940; doi:10.3390/ijms160716085), 2015-07-16
Supplement: ijms-16-16085-s001.pdf [file ijms-16-16085-s001.pdf]

## Supplementary Information

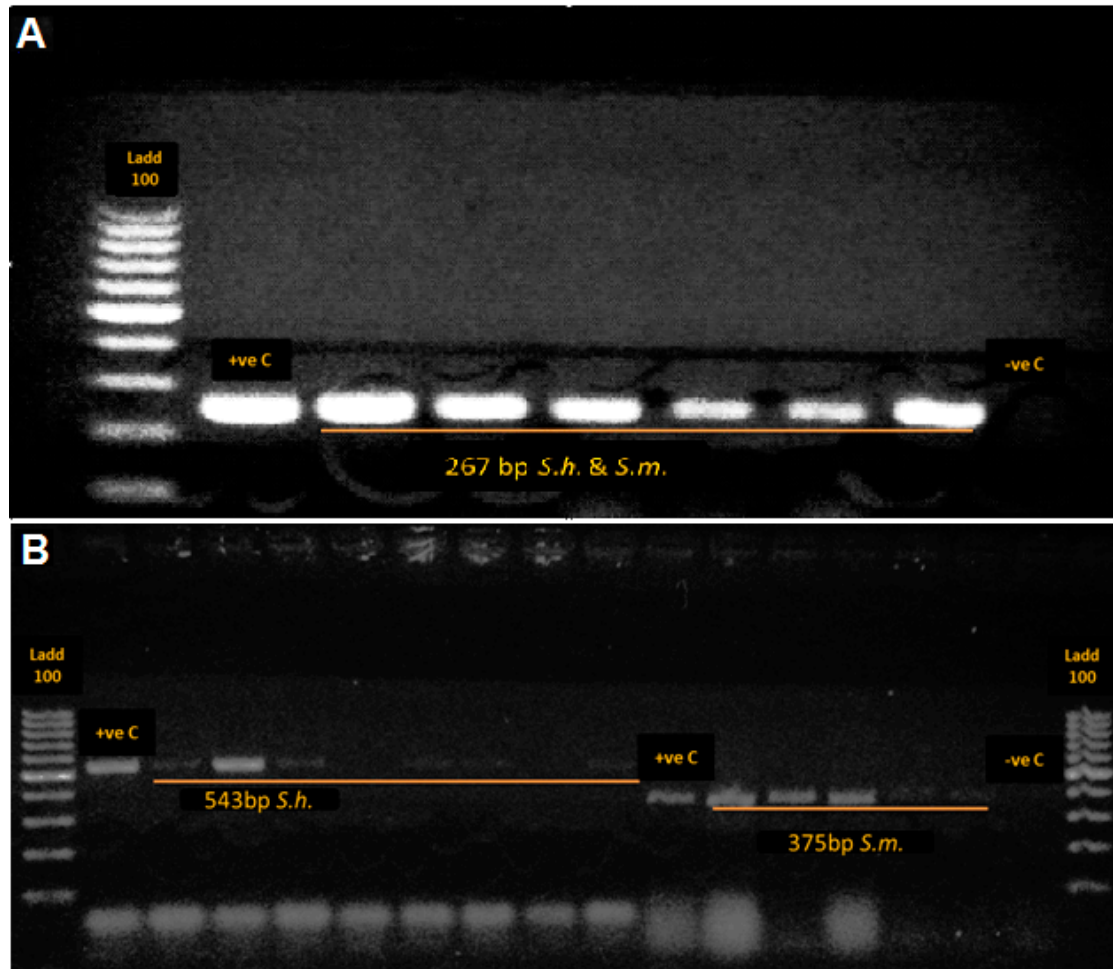

**Figure S1.** 2% agarose gel electrophoresis of *cox1* amplicons of *S. haematobium* (*S. h.*) and *S. mansoni* (*S. m.*) from urine and stool samples, showing the specific PCR profiles (A: new primers; B: pretested primers). Ladd 100 = 100 bp ladder, +ve C = positive control and -ve C = negative control.
